# Supplementary material for: Trends in bacterial and fungal communities in ant nests observed with Terminal-Restriction Fragment Length Polymorphism (T-RFLP) and Next Generation Sequencing (NGS) techniques—validity and compatibility in ecological studies
Source: PeerJ journal article supplement (doi:10.7717/peerj.5289), 2018-07-20

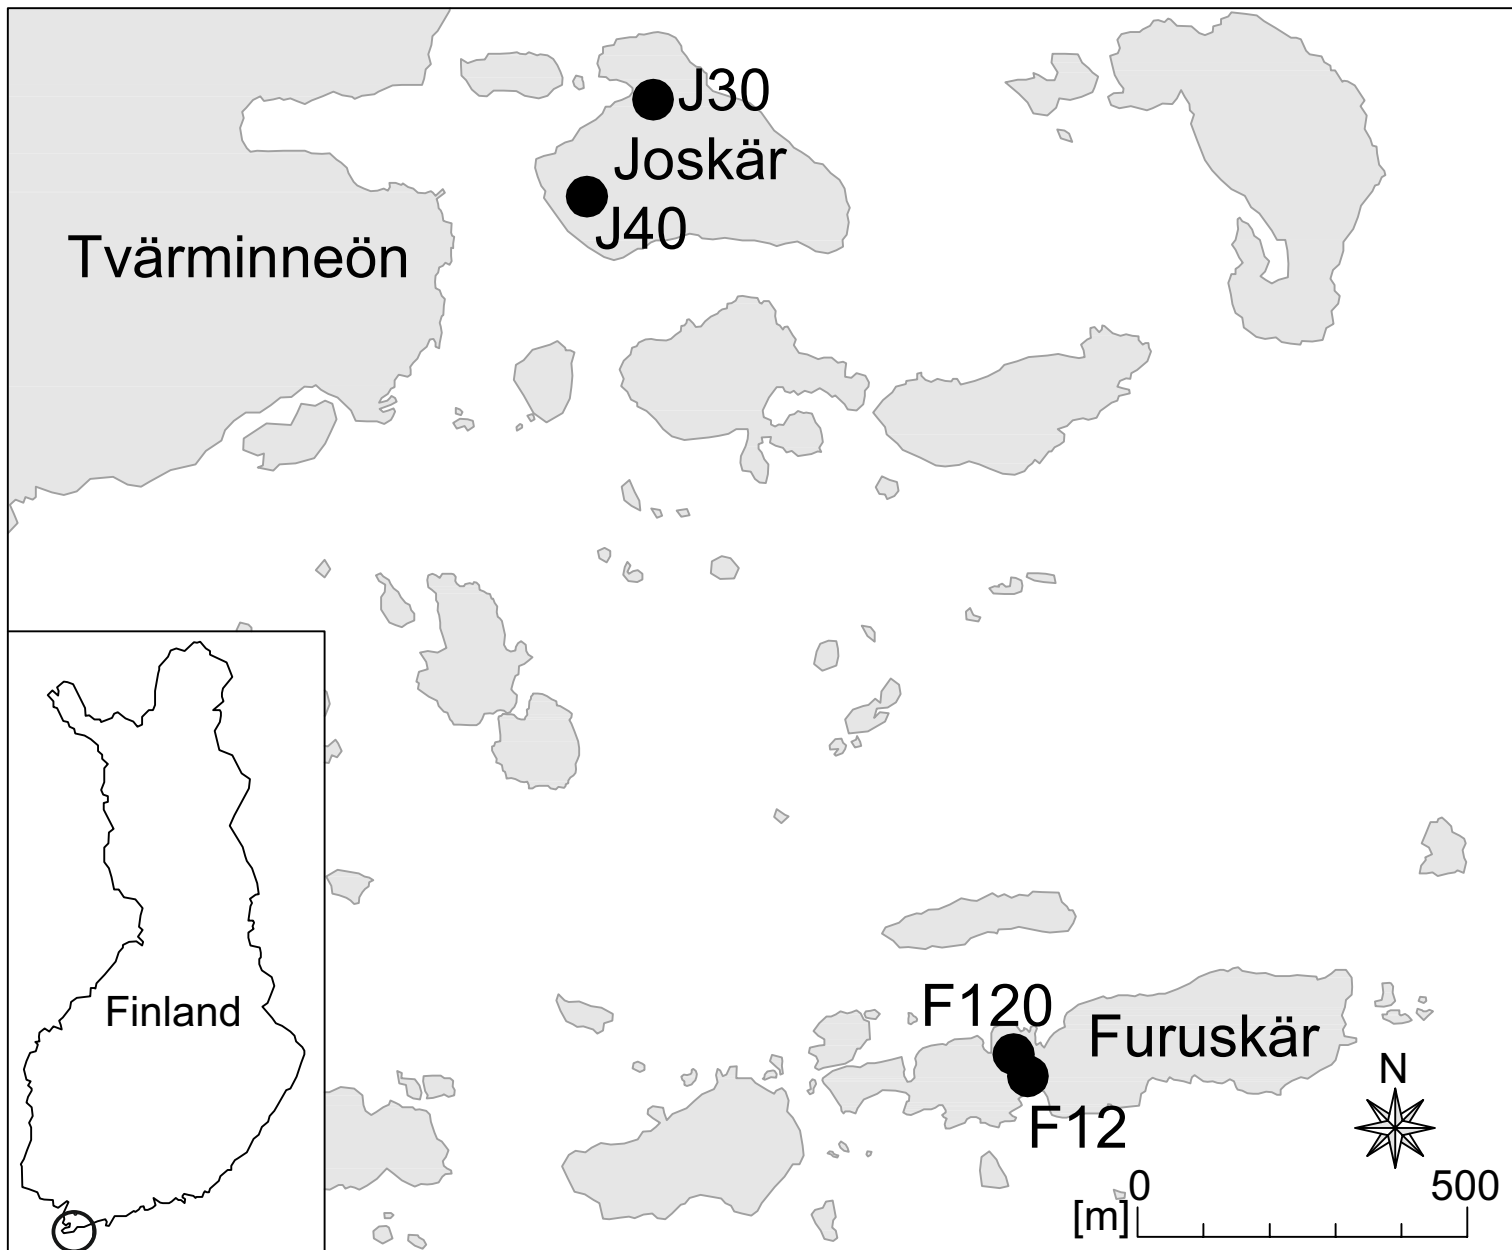

Supplement: SI_Figure_S1.pdf [file SI_Figure_S1.pdf]
